# Supplementary material
Source: PubMed Central journal article supplement (PMC5072404)
Supplement: mol-22-16_020_Lynam-Lennon_Suppl.pdf [file mol-22-16_020_Lynam-Lennon_Suppl.pdf]

## Supplemental Data

# Low MiR-187 Expression Promotes Resistance to Chemoradiation Therapy *In Vitro* and Correlates with Treatment Failure in Patients with Esophageal Adenocarcinoma

Niamh Lynam-Lennon,<sup>1\*</sup> Becky A S Bibby,<sup>2</sup> Ann Marie Mongan,<sup>1</sup> Laure Marignol,<sup>3</sup> Christian N Paxton,<sup>4</sup> Katherine Geiersbach,<sup>4,5</sup> Mary P Bronner,<sup>4,5</sup> Jacintha O'Sullivan,<sup>1</sup> John V Reynolds,<sup>1</sup> and Stephen G Maher<sup>1,2</sup>

Online address: <http://www.molmed.org>

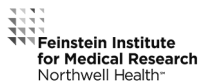

**Supplementary Table S1.** MiRNA significantly altered in pre-treatment EAC biopsies from responders and non-responders to neoadjuvant CRT.

| MicroRNA        | Responder (n=8) |                                      | Non-responder (n=10) |                     | p-value |
|-----------------|-----------------|--------------------------------------|----------------------|---------------------|---------|
|                 | Mean            | Median (range)                       | Mean                 | Median (range)      |         |
| hsa-let-7a-2*   | 0.22            | 0.10 (0.04-1.00)                     | 0.38                 | 0.32 (0.13-0.97)    | 0.007   |
| hsa-let-7d      | 0.91            | 0.90 (0.20-1.59)                     | 0.52                 | 0.50 (0.19-0.97)    | 0.018   |
| hsa-let-7f-1*   | 2.03            | 1.96 (1.00-3.03)                     | 1.36                 | 1.18 (0.22-2.58)    | 0.034   |
| hsa-let-7g      | 1.41            | 1.31 (0.90-2.03)                     | 1.03                 | 1.03 (0.43-1.67)    | 0.050   |
| hsa-miR-103-2*  | 4.57            | 2.29 (0.57-16.61)                    | 108.48               | 41.33 (2.03-568.92) | 0.003   |
| hsa-miR-1184    | 0.75            | 0.71 (0.56-1.02)                     | 1.01                 | 0.95 (0.60-1.65)    | 0.050   |
| hsa-miR-1236    | 0.46            | 0.15 (0.10-1.48)                     | 2.22                 | 0.92 (0.18-8.36)    | 0.029   |
| hsa-miR-1237    | 1.37            | 1.30 (1.00-2.12)                     | 2.5                  | 2.11 (1.47-5.81)    | 0.004   |
| hsa-miR-1248    | 0.61            | 0.45 (0.16-1.53)                     | 0.24                 | 0.25 (0.07-0.41)    | 0.019   |
| hsa-miR-125a-3p | 1.41            | 1.31 (0.90-2.03)                     | 1.03                 | 1.03 (0.43-1.67)    | 0.050   |
| hsa-miR-1296    | 3.31            | 1.14 (0.74-15.39)                    | 0.77                 | 0.75 (0.05-1.96)    | 0.029   |
| hsa-miR-140-3p  | 0.92            | 1.01 (0.41-1.39)                     | 2.61                 | 2.90 (0.77-4.80)    | 0.019   |
| hsa-miR-142-3p  | 0.93            | 0.94 (0.15-1.65)                     | 0.35                 | 0.27 (0.02-1.37)    | 0.037   |
| hsa-miR-145*    | 1.7             | 0.44 (0.09-9.56)                     | 3.83                 | 3.00 (0.71-14.50)   | 0.029   |
| hsa-miR-147     | 0.33            | 0.25 (0.12-1.00)                     | 0.62                 | 0.55 (0.21-1.09)    | 0.046   |
| hsa-miR-147b    | 0.34            | 0.23 (0.15-1.00)                     | 0.9                  | 0.71 (0.25-2.08)    | 0.009   |
| hsa-miR-151-5p  | 0.98            | 0.96 (0.31-1.64)                     | 0.7                  | 0.67 (0.46-0.95)    | 0.028   |
| hsa-miR-155*    | 1.81            | 1.05 (0.31-3.97)                     | 13.26                | 7.19 (2.31-60.54)   | 0.005   |
| hsa-miR-16-2*   | 0.91            | 0.90 (0.20-1.59)                     | 0.52                 | 0.50 (0.19-0.97)    | 0.037   |
| hsa-miR-17      | 0.61            | 0.45 (0.16-1.53)                     | 0.24                 | 0.25 (0.07-0.41)    | 0.019   |
| hsa-miR-181a-2* | 25.07           | 1.86 (1.00-140.70)                   | 101.54               | 96.74 (6.78-243.82) | 0.009   |
| hsa-miR-187     | 0.81            | 0.62 (0.35-2.09)                     | 2.41                 | 2.01 (0.69-6.36)    | 0.005   |
| hsa-miR-1979    | 2.04            | 1.06 (0.70-7.83)                     | 1.06                 | 0.85 (0.40-3.52)    | 0.001   |
| hsa-miR-21      | 0.75            | 0.71 (0.56-1.02)                     | 1.01                 | 0.95 (0.60-1.65)    | 0.050   |
| hsa-miR-212     | 0.52            | 0.42 (1.58 x 10 <sup>-4</sup> -1.17) | 1.29                 | 1.39 (0.12-2.70)    | 0.046   |
| hsa-miR-220c    | 1.68            | 1.51 (0.88-3.92)                     | 0.82                 | 0.60 (0.12-1.56)    | 0.029   |
| hsa-miR-26a     | 1.18            | 1.00 (0.53-2.91)                     | 0.59                 | 0.52 (0.23-1.18)    | 0.015   |
| hsa-miR-296-3p  | 1.6             | 1.02 (0.08-4.53)                     | 11.83                | 5.91 (1.24-62.96)   | 0.009   |
| hsa-miR-30c     | 0.99            | 1.00 (0.69-1.46)                     | 0.64                 | 0.65 (0.21-1.13)    | 0.019   |
| hsa-miR-30c-1*  | 1.18            | 1.00 (0.53-2.91)                     | 0.59                 | 0.52 (0.23-1.18)    | 0.015   |

Continued on the next page

Supplementary Table S1. *Continued.*

|                   |        |                                        |         |                                       |       |
|-------------------|--------|----------------------------------------|---------|---------------------------------------|-------|
| hsa-miR-31        | 0.33   | 0.25 (0.12-1.00)                       | 0.62    | 0.55 (0.21-1.09)                      | 0.046 |
| hsa-miR-320a      | 1.37   | 1.30 (1.00-2.12)                       | 2.5     | 2.11 (1.47-5.81)                      | 0.004 |
| hsa-miR-320b      | 0.46   | 0.43 (0.11-1.00)                       | 1.86    | 0.73 (0.29-10.62)                     | 0.034 |
| hsa-miR-330-5p    | 914.82 | 0.67 (2.96x 10 <sup>-6</sup> -7313.00) | 9720.09 | 6111.71 (2424.69-28958.61)            | 0.004 |
| hsa-miR-331-3p    | 2.03   | 1.96 (1.00-3.03)                       | 1.36    | 1.18 (0.22-2.58)                      | 0.034 |
| hsa-miR-339-3p    | 8.69   | 5.76 (1.00-26.89)                      | 68.02   | 20.97 (3.82-458.14)                   | 0.029 |
| hsa-miR-340*      | 1.84   | 1.32 (1.00-3.39)                       | 1.05    | 0.87 (0.43-2.23)                      | 0.023 |
| hsa-miR-370       | 0.88   | 0.67 (0.31-2.09)                       | 1.6     | 1.15 (0.48-3.19)                      | 0.034 |
| hsa-miR-373*      | 0.87   | 0.67 (0.31-2.04)                       | 1.84    | 1.46 (0.50-5.29)                      | 0.034 |
| hsa-miR-431*      | 0.86   | 0.72 (0.35-2.42)                       | 2.65    | 1.77 (1.09-8.30)                      | 0.004 |
| hsa-miR-432*      | 0.76   | 0.69 (0.22-2.08)                       | 0.14    | 0.06 (0.03-0.55)                      | 0.003 |
| hsa-miR-448       | 1.46   | 1.14 (0.38-4.58)                       | 0.75    | 0.54 (0.29-1.80)                      | 0.023 |
| hsa-miR-452*      | 24.73  | 9.40 (1.00-97.34)                      | 39.73   | 3.54 (1.60-355.07)                    | 0.050 |
| hsa-miR-488*      | 1.07   | 1.08 (0.21-1.89)                       | 0.54    | 0.54 (0.26-0.97)                      | 0.023 |
| hsa-miR-495       | 1.84   | 1.32 (1.00-3.39)                       | 1.05    | 0.87 (0.43-2.23)                      | 0.023 |
| hsa-miR-502-5p    | 1.54   | 1.67 (0.06-2.83)                       | 0.66    | 0.32 (0.04-1.75)                      | 0.046 |
| hsa-miR-513a-3p   | 0.99   | 1.00 (0.69-1.46)                       | 0.64    | 0.65 (0.21-1.13)                      | 0.019 |
| hsa-miR-518d-5p   | 0.48   | 0.28 (0.17-1.34)                       | 0.59    | 0.48 (0.21-1.30)                      | 0.009 |
| hsa-miR-519c-3p   | 1.06   | 0.75 (0.20-3.51)                       | 0.4     | 0.41 (0.03-0.72)                      | 0.029 |
| hsa-miR-532-5p    | 1.06   | 0.69 (0.29-2.32)                       | 0.32    | 0.20 (0.08-0.82)                      | 0.015 |
| hsa-miR-555       | 0.25   | 0.10 (0.01-1.00)                       | 0.31    | 0.29 (0.14-0.58)                      | 0.046 |
| hsa-miR-556-3p    | 3.63   | 1.12 (0.17-13.03)                      | 32.3    | 13.86 (0.73-120.27)                   | 0.015 |
| hsa-miR-556-5p    | 5.85   | 6.75 (1.00-11.23)                      | 2.15    | 1.62 (0.15-6.32)                      | 0.046 |
| hsa-miR-558       | 0.98   | 0.83 (0.42-1.82)                       | 2.09    | 1.60 (0.34-7.86)                      | 0.042 |
| hsa-miR-592       | 48.66  | 4.65 (1.00-335.43)                     | 189.97  | 60.78 (4.08-762.68)                   | 0.029 |
| hsa-miR-630       | 0.93   | 0.94 (0.15-1.65)                       | 0.35    | 0.27 (0.02-1.37)                      | 0.037 |
| hsa-miR-634       | 2.97   | 0.99 (0.65-16.60)                      | 0.69    | 0.64 (0.38-1.05)                      | 0.019 |
| hsa-miR-640       | 5.56   | 4.10 (1.00-16.37)                      | 1.19    | 0.76 (0.11-4.61)                      | 0.007 |
| hsa-miR-647       | 1.54   | 1.67 (0.06-2.83)                       | 0.66    | 0.32 (0.04-1.75)                      | 0.046 |
| hsa-miR-661       | 2.04   | 1.06 (0.70-7.83)                       | 1.06    | 0.85 (0.40-3.52)                      | 0.046 |
| hsa-miR-720       | 0.98   | 0.83 (0.42-1.82)                       | 2.09    | 1.60 (0.34-7.86)                      | 0.042 |
| hsa-miR-769-3p    | 0.89   | 0.87 (0.42-1.37)                       | 0.27    | 0.21 (3.00 x 10 <sup>-3</sup> - 0.75) | 0.002 |
| hsa-miR-769-5p    | 0.67   | 0.68 (0.20-1.21)                       | 1.54    | 1.10 (0.45-5.97)                      | 0.042 |
| hsa-miR-886-5p    | 0.46   | 0.43 (0.11-1.00)                       | 1.86    | 0.73 (0.29-10.62)                     | 0.034 |
| hsa-miR-99b*      | 0.2    | 0.02 (0.01-1.00)                       | 0.23    | 0.19 (0.06-0.48)                      | 0.034 |
| hsa-miRPlus-C1066 | 12.06  | 1.29 (1.00-39.01)                      | 89.74   | 50.12 (22.65-297.71)                  | 0.003 |
| hsa-miRPlus-D1061 | 0.38   | 0.28 (0.10-1.00)                       | 4.37    | 1.23 (0.21-28.15)                     | 0.011 |

**Supplementary Table S2.** Genes significantly downregulated in miR-187 overexpressing OE33 R cells, compared to vector control.

| Gene     | Locus                     | Vector control | miR-187  |
|----------|---------------------------|----------------|----------|
| APOL6    | chr22:36044423-36064456   | 20.79          | 15.48    |
| UNC93B1  | chr11:67758574-67771593   | 104.27         | 77.21    |
| MXD1     | chr2:70142172-70170076    | 11.79          | 8.70     |
| SP110    | chr2:231033644-231090444  | 72.40          | 53.15    |
| IFI16    | chr1:158979681-159024945  | 73.84          | 53.76    |
| MOV10    | chr1:113217047-113243368  | 70.83          | 51.54    |
| CDKN1A   | chr6:36644236-36655116    | 67.61          | 49.12    |
| BST2     | chr19:17513754-17516384   | 331.99         | 240.67   |
| IRF7     | chr11:612554-615999       | 583.49         | 422.58   |
| B3GNT3   | chr19:17905918-17926789   | 22.21          | 16.00    |
| IRF1     | chr5:131746464-131826465  | 63.81          | 45.74    |
| HIP1R    | chr12:123320038-123347507 | 30.53          | 21.87    |
| PLAUR    | chr19:44150246-44174498   | 214.19         | 153.42   |
| C3       | chr19:6677845-6720662     | 11.28          | 8.05     |
| PRIC285  | chr20:62189438-62205592   | 145.23         | 102.85   |
| C19orf66 | chr19:10196805-10213425   | 54.39          | 38.21    |
| SEMA7A   | chr15:74701629-74726299   | 34.69          | 24.36    |
| PPM1K    | chr4:89181531-89205888    | 4.89           | 3.43     |
| HLA-H    | chr6:29855382-29858856    | 40.39          | 28.26    |
| CMPK2    | chr2:6988450-7005936      | 18.99          | 13.23    |
| LY6E     | chr8:144099901-144103827  | 259.50         | 180.62   |
| IFIH1    | chr2:163123588-163175256  | 90.99          | 63.03    |
| TINF2    | chr14:24708850-24711880   | 15.54          | 10.76    |
| IFI44L   | chr1:79086087-79111830    | 11.61          | 8.02     |
| MX2      | chr21:42733949-42780869   | 144.97         | 99.56    |
| MOBK2C   | chr1:47073386-47082563    | 6.40           | 4.39     |
| SECTM1   | chr17:80278899-80291921   | 58.35          | 40.00    |
| TMEM27   | chrX:15645440-15683154    | 16.72          | 11.45    |
| APOL1    | chr22:36649116-36663577   | 151.91         | 103.86   |
| NLRC5    | chr16:57023409-57117436   | 14.27          | 9.75     |
| PARP10   | chr8:145051319-145060635  | 102.75         | 69.68    |
| CD274    | chr9:5450502-5470567      | 8.70           | 5.89     |
| PLEKHA4  | chr19:49340351-49371885   | 22.95          | 15.51    |
| DDX58    | chr9:32455299-32526322    | 51.03          | 34.44    |
| RARRES3  | chr11:63304272-63313930   | 302.42         | 203.64   |
| KRT16    | chr17:39766030-39769079   | 13.75          | 9.26     |
| UBE2L6   | chr11:57319127-57335803   | 263.53         | 176.45   |
| STAT2    | chr12:56735381-56754037   | 47.35          | 31.64    |
| RAPGEF3  | chr12:48128452-48152889   | 5.15           | 3.42     |
| MT2A     | chr16:56642477-56643409   | 2,148.53       | 1,423.24 |
| PSMB9    | chr6:32821937-32827628    | 61.40          | 40.59    |
| IFITM3   | chr11:319672-320914       | 1,117.03       | 733.92   |
| LAMP3    | chr3:182840002-182880667  | 35.28          | 23.17    |
| CD68     | chr17:7482804-7485429     | 23.11          | 15.17    |
| HLA-B    | chr6:31321648-31324989    | 891.68         | 584.92   |
| TLR3     | chr4:186990308-187006252  | 3.78           | 2.47     |
| RNF19B   | chr1:33402049-33430370    | 24.03          | 15.45    |
| *        | chr15:45023406-45025268   | 43.51          | 27.97    |
| TRANK1   | chr3:36868307-36986548    | 5.02           | 3.21     |
| APOL2    | chr22:36622254-36636000   | 101.98         | 65.27    |
| BTN3A1   | chr6:26402464-26415444    | 4.97           | 3.16     |

*Continued on the next page*

Supplementary Table S2. *Continued.*

|         |                           |          |          |
|---------|---------------------------|----------|----------|
| LMO2    | chr11:33880122-33913836   | 35.88    | 22.74    |
| *       | chr1:174958930-174961330  | 6.74     | 4.27     |
| SLFN12  | chr17:33738080-33759543   | 4.57     | 2.88     |
| ISG15   | chr1:948846-949919        | 3,842.28 | 2,426.24 |
| NT5C3   | chr7:33053741-33102409    | 136.34   | 85.44    |
| PRR15   | chr7:29603426-29606911    | 22.43    | 14.02    |
| SP100   | chr2:231280870-231410317  | 163.96   | 102.11   |
| EPSTI1  | chr13:43462116-43566413   | 43.15    | 26.58    |
| IFIT2   | chr10:91061705-91069033   | 254.00   | 155.35   |
| CEACAM1 | chr19:43011457-43032661   | 7.49     | 4.58     |
| IFIT1   | chr10:91152321-91163744   | 752.85   | 458.37   |
| ETV7    | chr6:36321992-36355577    | 44.38    | 27.02    |
| IFI6    | chr1:27992571-27998724    | 1,168.40 | 710.37   |
| CCL5    | chr17:34198495-34207377   | 41.73    | 25.30    |
| IFI27   | chr14:94577078-94583033   | 504.97   | 304.57   |
| TAP1    | chr6:32808493-32821748    | 183.81   | 110.65   |
| HLA-F   | chr6:29691116-29716826    | 162.54   | 97.30    |
| IL22RA1 | chr1:24446260-24469775    | 5.37     | 3.21     |
| GSDMB   | chr17:38060847-38075008   | 71.93    | 42.66    |
| HERC5   | chr4:89378267-89427314    | 8.88     | 5.25     |
| OAS1    | chr12:113344738-113357712 | 319.96   | 188.88   |
| LGALS9  | chr17:25958173-25976586   | 78.64    | 46.38    |
| USP18   | chr22:18632757-18660162   | 107.23   | 62.64    |
| PXK     | chr3:58318616-58411611    | 3.12     | 1.81     |
| RTP4    | chr3:187086167-187089369  | 12.38    | 7.17     |
| PLXNA2  | chr1:208195587-208417665  | 1.96     | 1.13     |
| *       | chr1:174961391-174964434  | 7.14     | 4.11     |
| CD74    | chr5:149781199-149792499  | 7.00     | 4.01     |
| MMP13   | chr11:102813720-102826463 | 7.99     | 4.54     |
| IFIT3   | chr10:91087601-91100725   | 203.75   | 114.78   |
| APOL3   | chr22:36536370-36562225   | 3.63     | 2.03     |
| SAMD9L  | chr7:92759367-92777680    | 47.86    | 26.58    |
| OASL    | chr12:121458094-121476780 | 369.93   | 204.92   |
| IFITM1  | chr11:313990-315272       | 302.78   | 167.71   |
| MX1     | chr21:42792519-42831141   | 83.31    | 45.71    |
| GBP4    | chr1:89646830-89664633    | 2.35     | 1.26     |
| GBP1    | chr1:89517986-89531043    | 13.46    | 7.21     |
| OAS2    | chr12:113416255-113449572 | 152.63   | 81.47    |
| KRT17   | chr17:39775691-39780882   | 100.46   | 53.47    |
| IFI35   | chr17:41158741-41166476   | 138.41   | 72.82    |
| NCF2    | chr1:183524696-183560056  | 7.42     | 3.89     |
| SAA1    | chr11:18287807-18291523   | 14.82    | 7.66     |
| IDO1    | chr8:39771327-39786309    | 13.66    | 7.04     |
| CFB     | chr6:31913720-31919861    | 19.83    | 10.20    |
| XAF1    | chr17:6659155-6678964     | 16.81    | 8.60     |
| TNFSF10 | chr3:172223297-172241297  | 21.43    | 10.76    |
| BTN3A3  | chr6:26440699-26453643    | 2.98     | 1.48     |
| ZNF526  | chr19:42724491-42732353   | 17.39    | 8.38     |
| ISG20   | chr15:89182038-89198879   | 180.28   | 86.55    |
| HRASLS2 | chr11:63320241-63330855   | 17.91    | 8.58     |
| DHX58   | chr17:40253421-40264751   | 5.44     | 2.59     |
| *       | chr5:90604836-90606159    | 2.49     | 1.18     |
| CCL22   | chr16:57392694-57400102   | 1.51     | 0.71     |

*Continued on the next page*

Supplementary Table S2. *Continued.*

|                |                           |               |          |
|----------------|---------------------------|---------------|----------|
| RHEBL1         | chr12:49458467-49463775   | 4.01          | 1.83     |
| PRICKLE4       | chr6:41748499-41755110    | 4.52          | 2.06     |
| UBA7           | chr3:49842637-49851391    | 4.80          | 2.13     |
| GBP5           | chr1:89724633-89738544    | 1.67          | 0.71     |
| BCL2L14        | chr12:12223877-12252627   | 2.17          | 0.91     |
| GMPR           | chr6:16238810-16295780    | 6.45          | 2.65     |
| RSAD2          | chr2:7017795-7038363      | 65.43         | 26.56    |
| TRIM22         | chr11:5710816-5732093     | 27.00         | 10.92    |
| *              | chr12:54388732-54389310   | 3.44          | 1.33     |
| HECTD2         | chr10:93066718-93371217   | 16.63         | 6.37     |
| NUPR1          | chr16:28548661-28550495   | 5.20          | 1.91     |
| ZBP1           | chr20:56178644-56195632   | 10.09         | 3.56     |
| IL29           | chr19:39786964-39789312   | 29.40         | 10.09    |
| *              | chr1:174957775-174957993  | 58.96         | 19.39    |
| BATF2          | chr11:64755416-64764517   | 25.57         | 8.38     |
| RAB11FIP4      | chr17:29718641-29865232   | 18.08         | 5.91     |
| CXCL11         | chr4:76932336-77033955    | 5.92          | 1.93     |
| *              | chr2:177065589-177065961  | 6.88          | 2.10     |
| CXCL10         | chr4:76932336-77033955    | 14.99         | 4.39     |
| RRAD           | chr16:66955581-66959439   | 38.20         | 10.51    |
| KRT14          | chr17:39738530-39743147   | 4.73          | 1.27     |
| IL28B          | chr19:39734271-39735611   | 16.25         | 4.16     |
| *              | chr5:176513441-176513467  | 35,256.90     | 8,685.15 |
| C7orf43        | chr7:99752042-99756345    | 122.98        | 29.26    |
| IL28A          | chr19:39759156-39760732   | 25.53         | 5.96     |
| IFNB1          | chr9:21077103-21077943    | 6.94          | 1.24     |
| *              | chrX:18245705-18245731    | 35,226.00     | 4,943.46 |
| PYROXD2        | chr10:100143321-100174978 | 10.25         | 0.97     |
| *              | chr14:105010581-105025113 | 56,946,600.00 | 0.00     |
| *              | chr14:50505431-50505860   | 1.96          | 0.00     |
| *              | chr5:108824444-108829226  | 8,256.79      | 0.00     |
| *              | chr6:11463226-11473719    | 10,740.30     | 0.00     |
| *              | chr7:20368988-20369125    | 22.99         | 0.00     |
| KRT19P2,MIR492 | chr12:95228173-95228804   | 23.85         | 0.00     |
| *              | chr16:33964497-33964534   | 1,018.30      | 0.00     |
| *              | chr15:59699955-59700157   | 3.90          | 0.00     |
| *              | chr17:58050941-58051088   | 8.63          | 0.00     |

\*Denotes novel non-annotated genes.

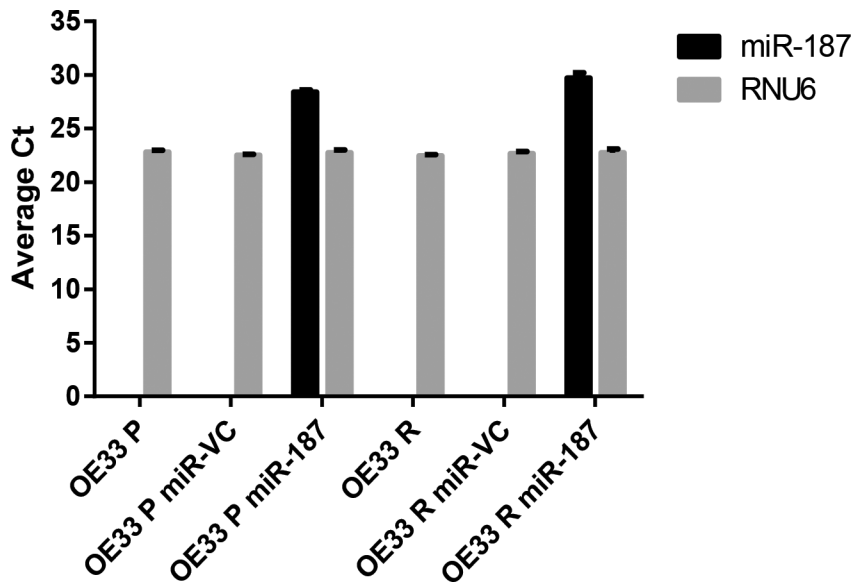

**Supplementary Figure S1.** Confirmation of miR-187 overexpression by qPCR. MiR-187 overexpression was confirmed in OE33 P and OE33 R cells at 24 h post transfection, when compared to a scrambled vector control. There was no detectable miR-187 expression in the OE33 P or OE33 R cell lines. RNU6 expression was measured as an endogenous control. Data are presented as the mean  $\pm$  SEM from 3 independent experiments.
